# Supplementary material for: Leucine-Enriched Essential Amino Acids Enhance the Antiseizure Effects of the Ketogenic Diet in Rats
Source: Frontiers journal article supplement (doi:10.3389/fnins.2021.637288), 2021-03-19
Supplement: Data_Sheet_1.PDF [file Data_Sheet_1.PDF]

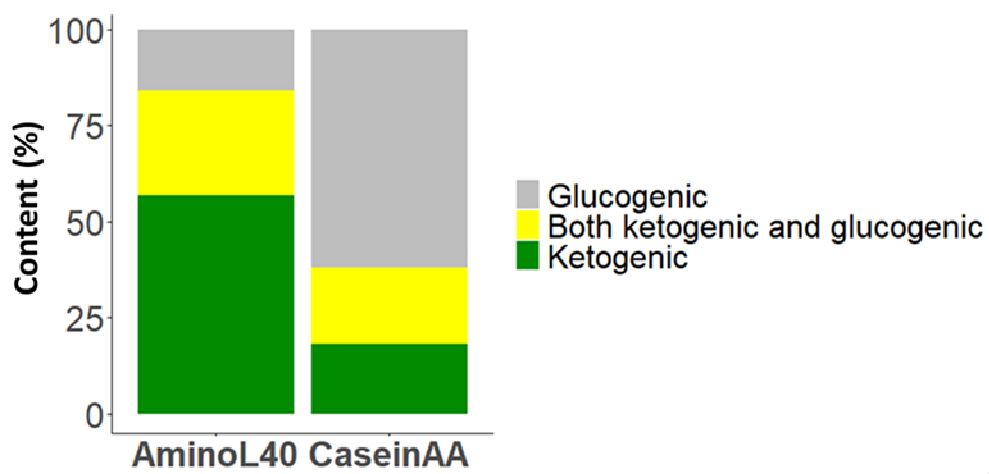

**Supplementary Fig. S1**

Content ratio of ketogenic and glucogenic amino acids in the AminoL40 and CaseinAA mixtures.

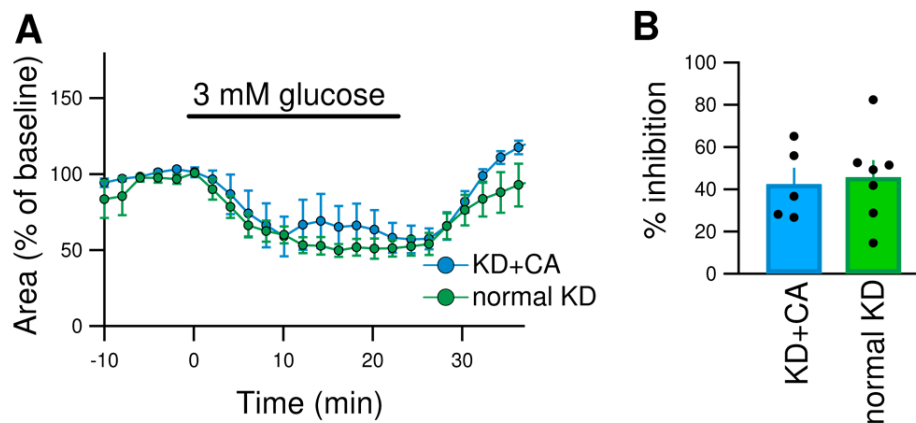

### Supplementary Fig. S2

(A) Time course of the effect of a reduced glucose concentration (3 mM glucose) for 25 min on the area of bicuculline-induced bursting (% of baseline) in the slices from KD+CA-fed and normal KD-fed rats (A2) Summary of inhibition of the area of seizure-like bursting in slices from KD+CA-fed and normal KD-fed rats in the presence of 3 mM glucose.  $t(10) = 0.2869$ ,  $P = 0.7801$ ; unpaired  $t$ -test; KD+CA,  $n = 5$ ; normal KD,  $n = 7$ . The same data for KD+CA as in Fig. 3B and 3C. A subset of data for the normal KD was modified from a previous report (Kawamura et al. 2014).

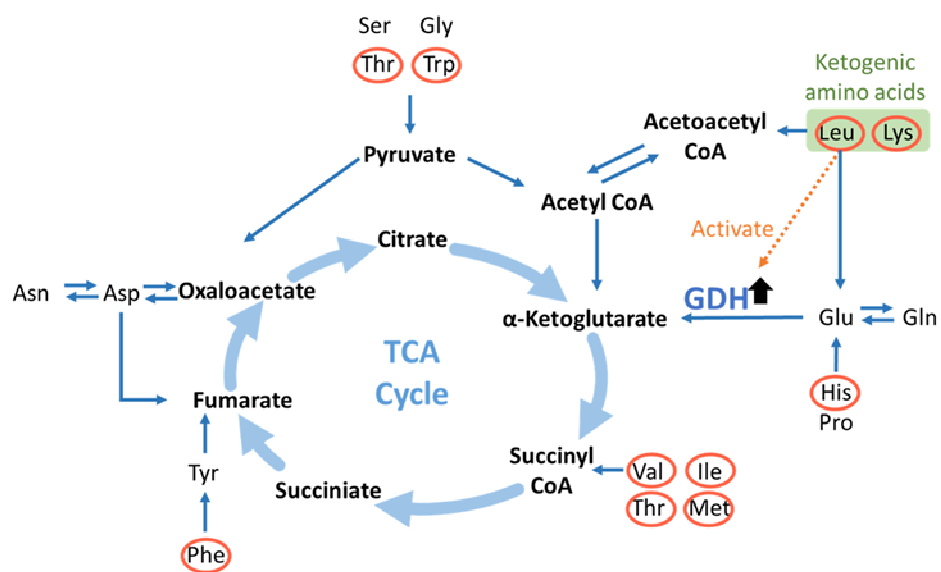

### Supplementary Fig. S3

Fates of amino acids entering the TCA cycle. The red circles indicate amino acids included in AminoL40.
